# Supplementary material for: BRD4 isoforms have distinct roles in tumour progression and metastasis in rhabdomyosarcoma
Source: PubMed Central journal article supplement (PMC10897194; doi:10.1038/s44319-023-00033-1), 2024-01-08
Supplement: 44319_2023_33_MOESM10_ESM.pdf [file 44319_2023_33_MOESM10_ESM.pdf]

## Expanded View Figures

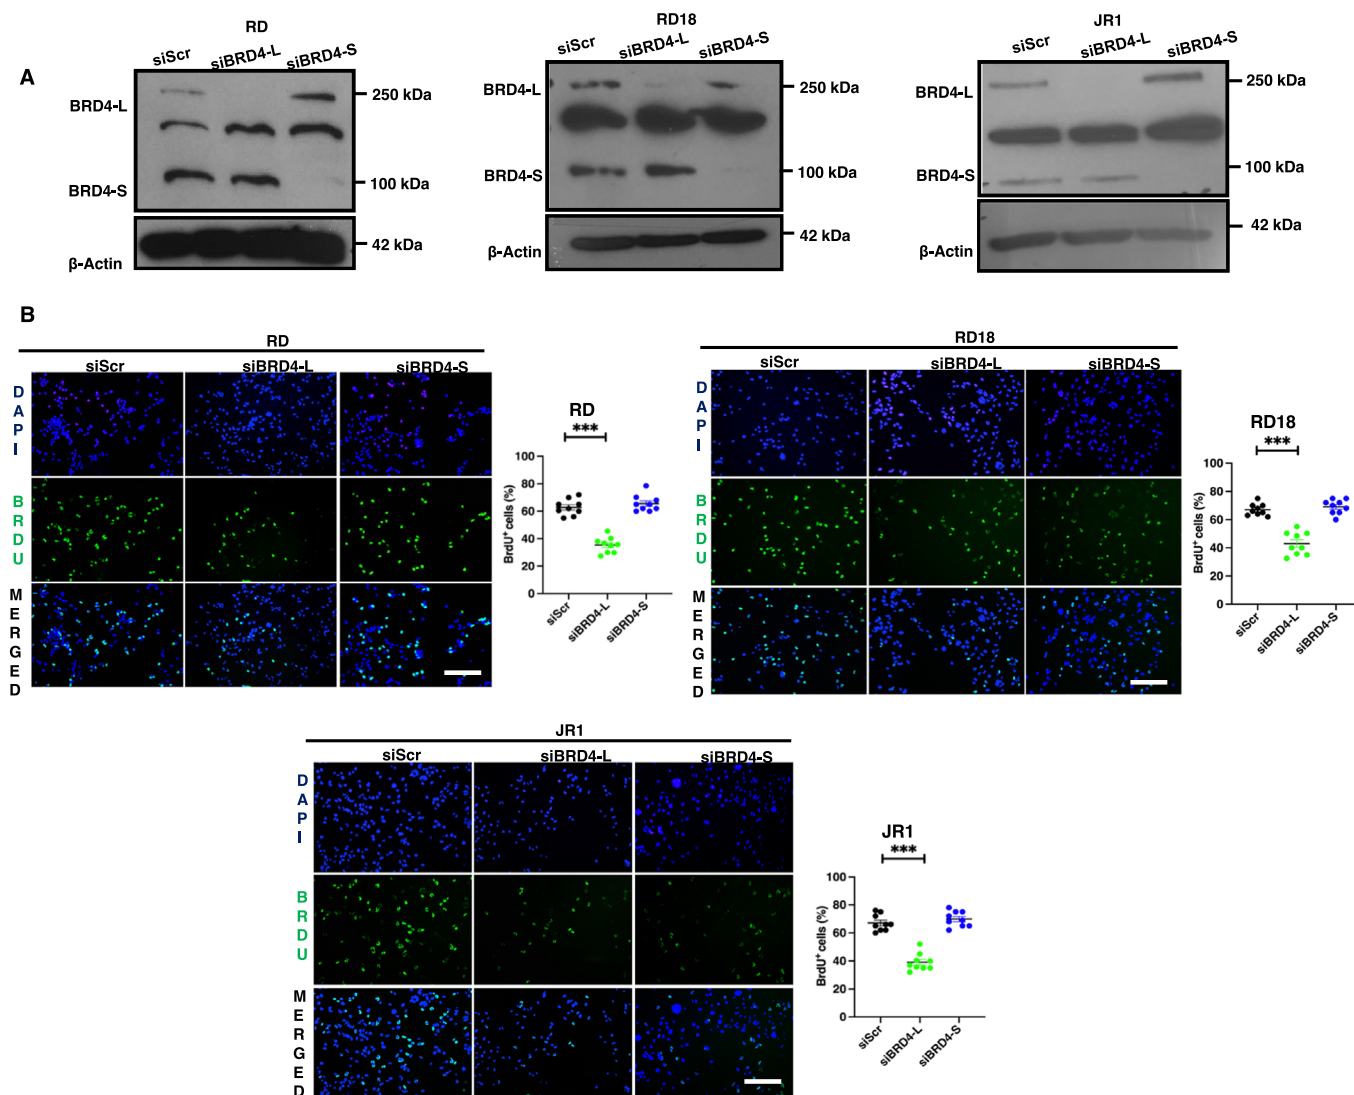

**Figure EV1. BRD4-L knockdown represses proliferation.**

(A) Western blot analysis showing transient BRD4 knockdown efficiency in siBRD4-L and siBRD4-S RD, RD18 and JR1 cells as indicated.  $\beta$ -Actin was used as the loading control. Images are representative of at least three biological replicates. (B) Proliferation was analysed by BrdU assay in control (siScr), siBRD4-L and siBRD4-S RD, RD18 and JR1 cells as indicated. Images are representative of at least three biological replicates. Scale bar: 100  $\mu$ m. Scatter plot showing the percentage of BrdU<sup>+</sup> cells in siScr, siBRD4-L and siBRD4-S cells. Values correspond to the average  $\pm$  SEM ( $n = 3$  biological replicates with 3 technical replicates shown). Two-tailed non-parametric unpaired t test was performed for statistical analysis. \*\*\* $p \leq 0.001$ .

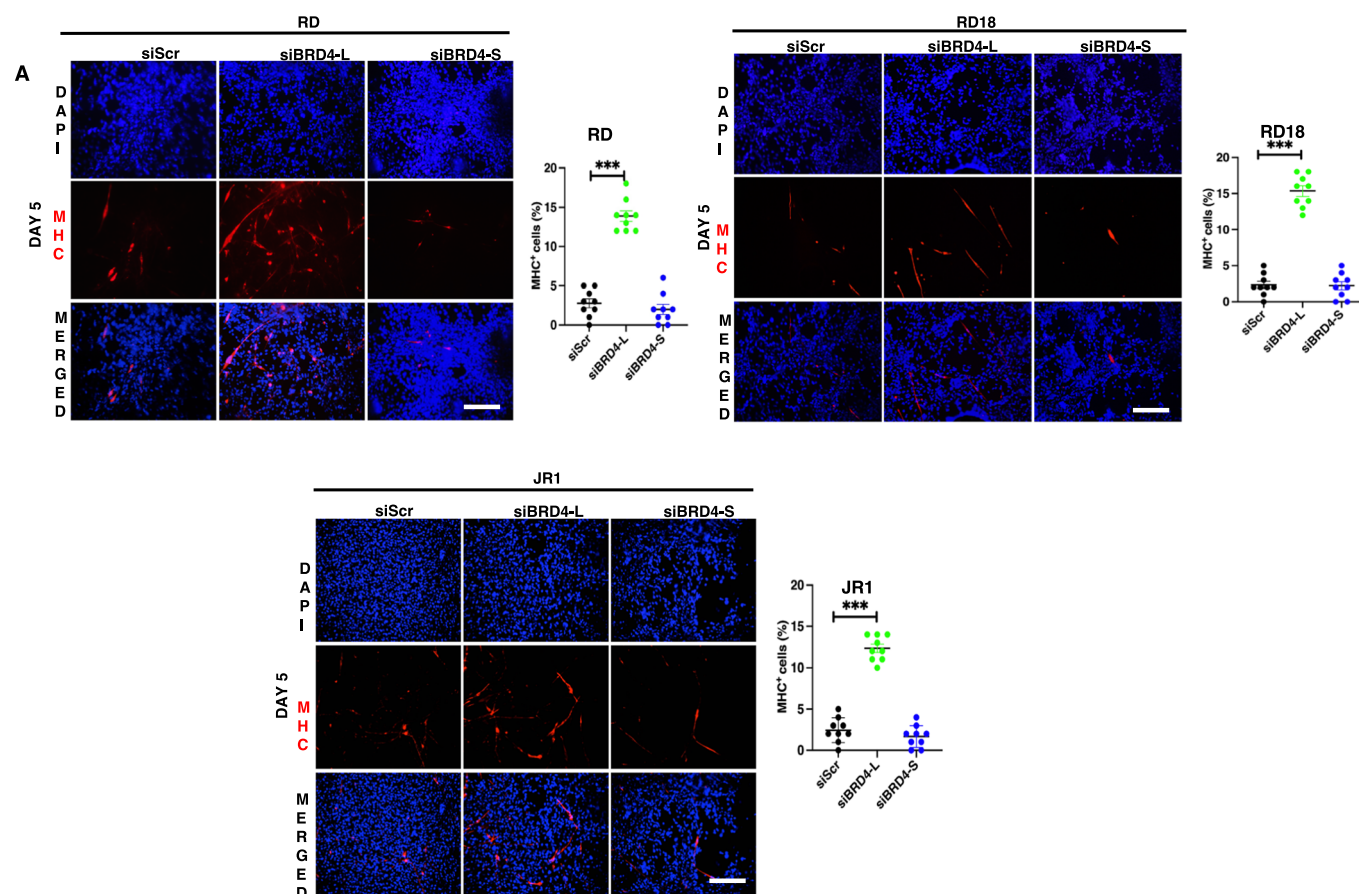

**Figure EV2. BRD4-L knockdown enhances differentiation.**

(A) Differentiation was analysed by immunofluorescence in siScr, siBRD4-L and siBRD4-S in RD, RD18 and JR1 cells as indicated. Forty-eight hours post-transfection, cells were cultured in differentiation media for 5 days and MHC<sup>+</sup> cells were analysed using anti-MHC antibody. Images are representative of at least three biological replicates. Nuclei were stained with DAPI (blue). Scale bar: 100  $\mu$ m. Scatter plots indicating the percentage of MHC<sup>+</sup> cells in siScr, siBRD4-L and siBRD4-S cells. Values correspond to the average  $\pm$  SEM ( $n = 3$  biological replicates with 3 technical replicates shown). Two-tailed non-parametric unpaired t test was performed for statistical analysis. \*\*\* $p \leq 0.001$ .

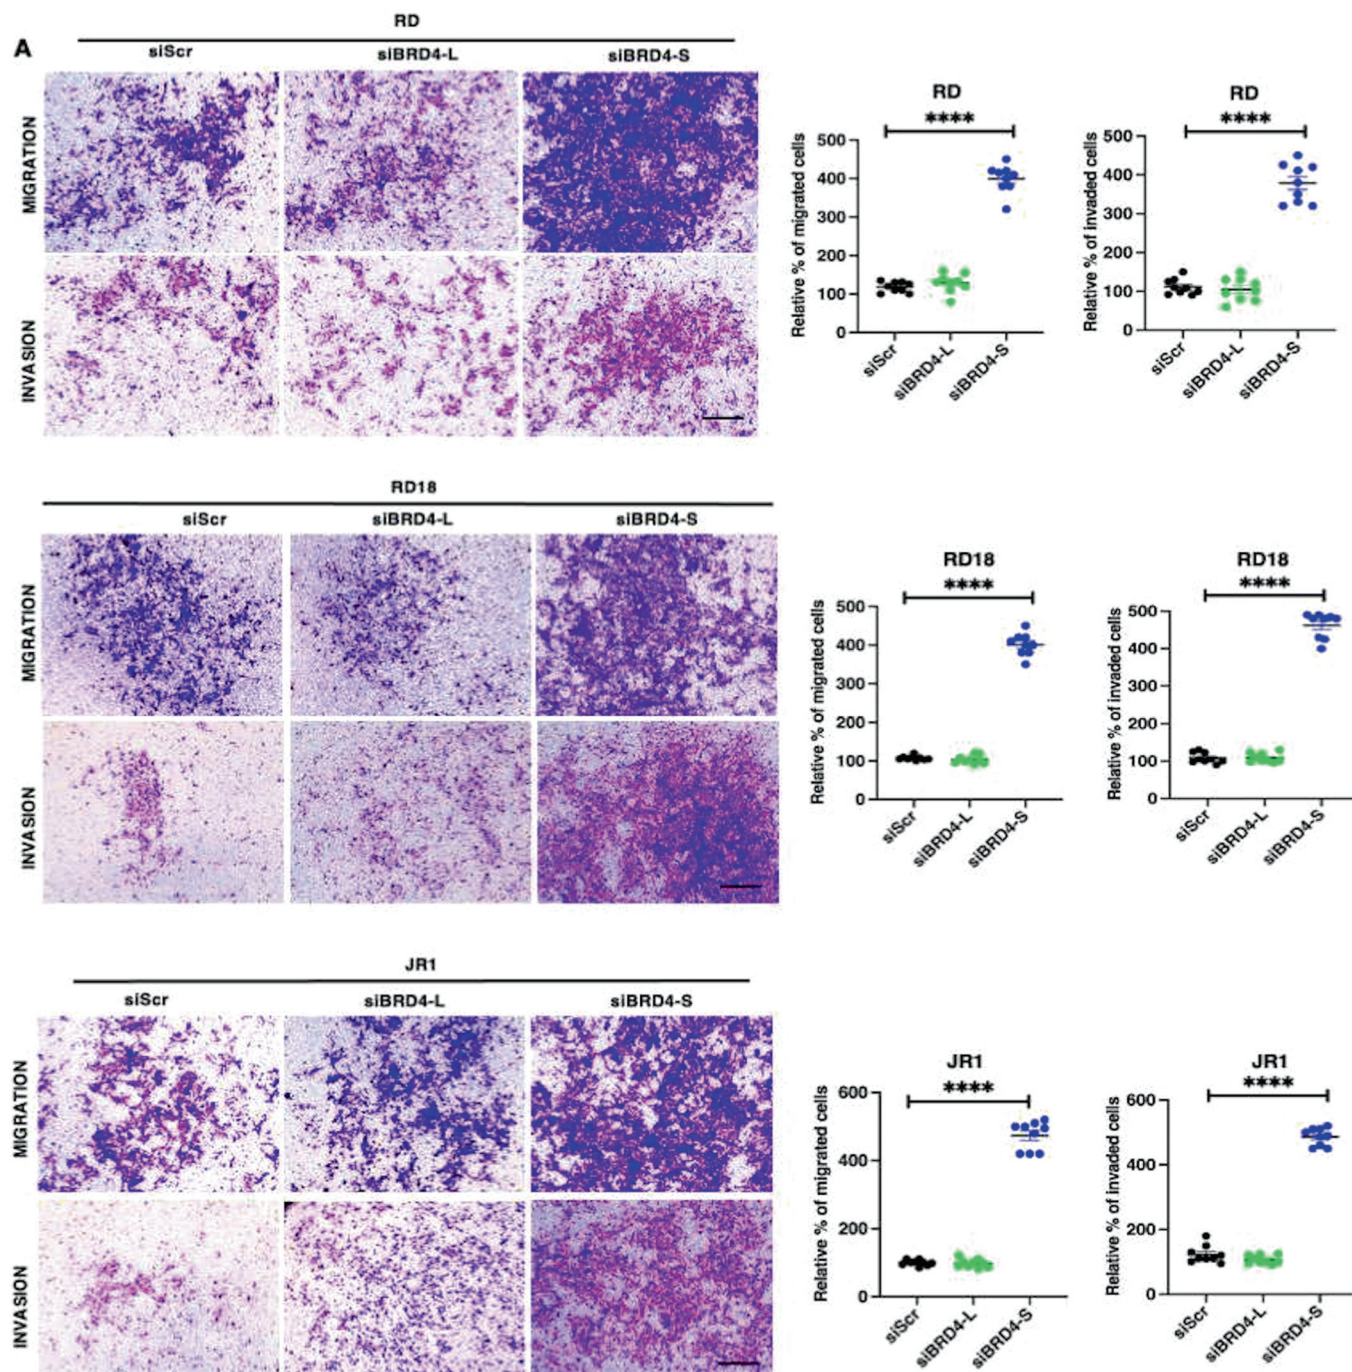

**Figure EV3. BRD4-S knockdown increases cellular migration and invasion.**

(A) Migration and invasion was analysed by Transwell assays in siScr, siBRD4-L and siBRD4-S RD, RD18 and JR1 cells as indicated. The inserts were stained with crystal violet. Images are representative of at least three biological replicates. Scale bar: 100  $\mu$ m. Scatter plots indicating the percentage of migration and invasion is shown. Values correspond to the average  $\pm$  SEM. Values correspond to the average  $\pm$  SEM ( $n = 3$  biological replicates with 3 technical replicates shown). Two-tailed non-parametric unpaired t test was performed for statistical analysis. \*\*\*\* $p \leq 0.0001$ .



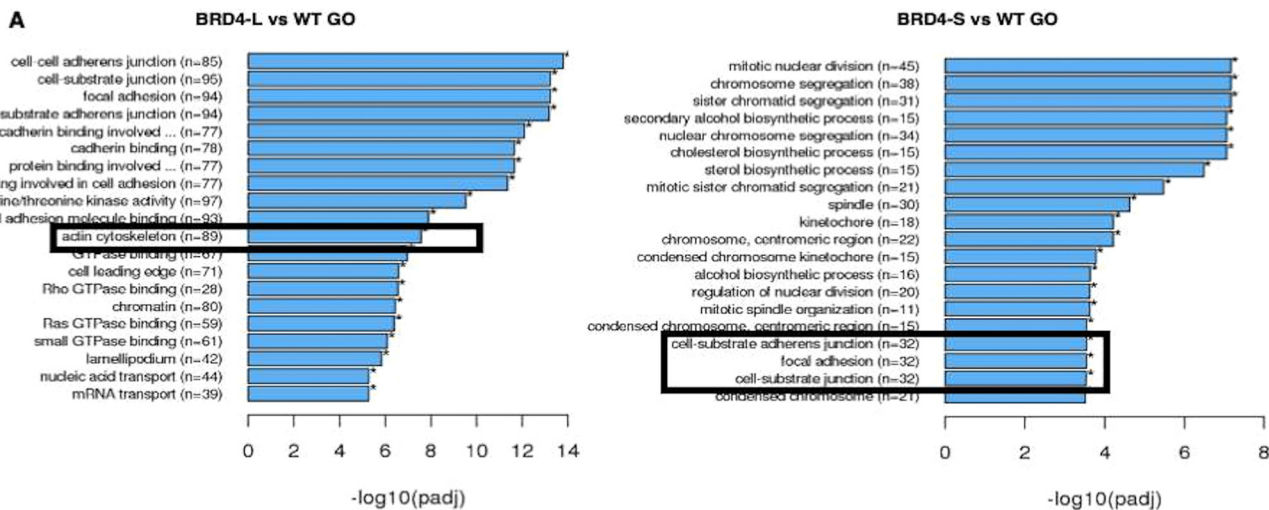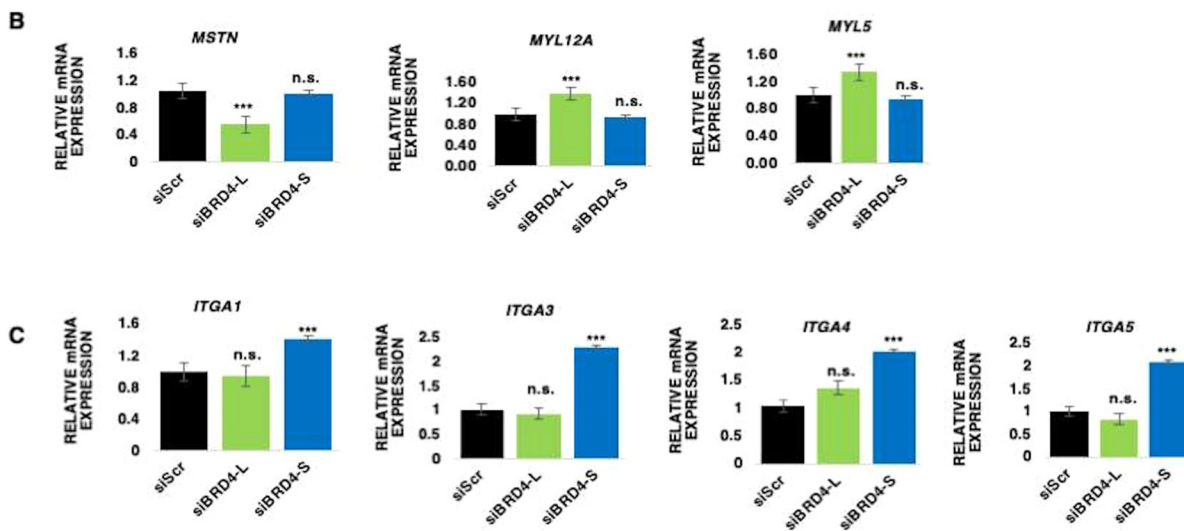

**Figure EV4. Validation of BRD4-L and BRD4-S targets.**

(A) GO enrichment histogram showing significantly enriched biological processes upon BRD4-L and BRD4-S knockdown based on the number of differentially expressed genes. (B) RT-qPCR analysis of *MSTN*, *MYL12A* and *MYL5* mRNA in siScr, siBRD4-L and siBRD4-S cells. The values correspond to average  $\pm$  SEM ( $n = 4$  biological replicates). n.s. = not significant,  $***p \leq 0.001$ , n.s. not significant. (C) RT-qPCR analysis of the integrin (*ITGA1*, *ITGA3*, *ITGA4* and *ITGA5*) mRNA in siScr, siBRD4-L and siBRD4-S cells. The values correspond to average  $\pm$  SEM ( $n = 4$  biological replicates). Two-tailed non-parametric unpaired t test was performed for statistical analysis. n.s. not significant,  $***p \leq 0.001$ , n.s. not significant.

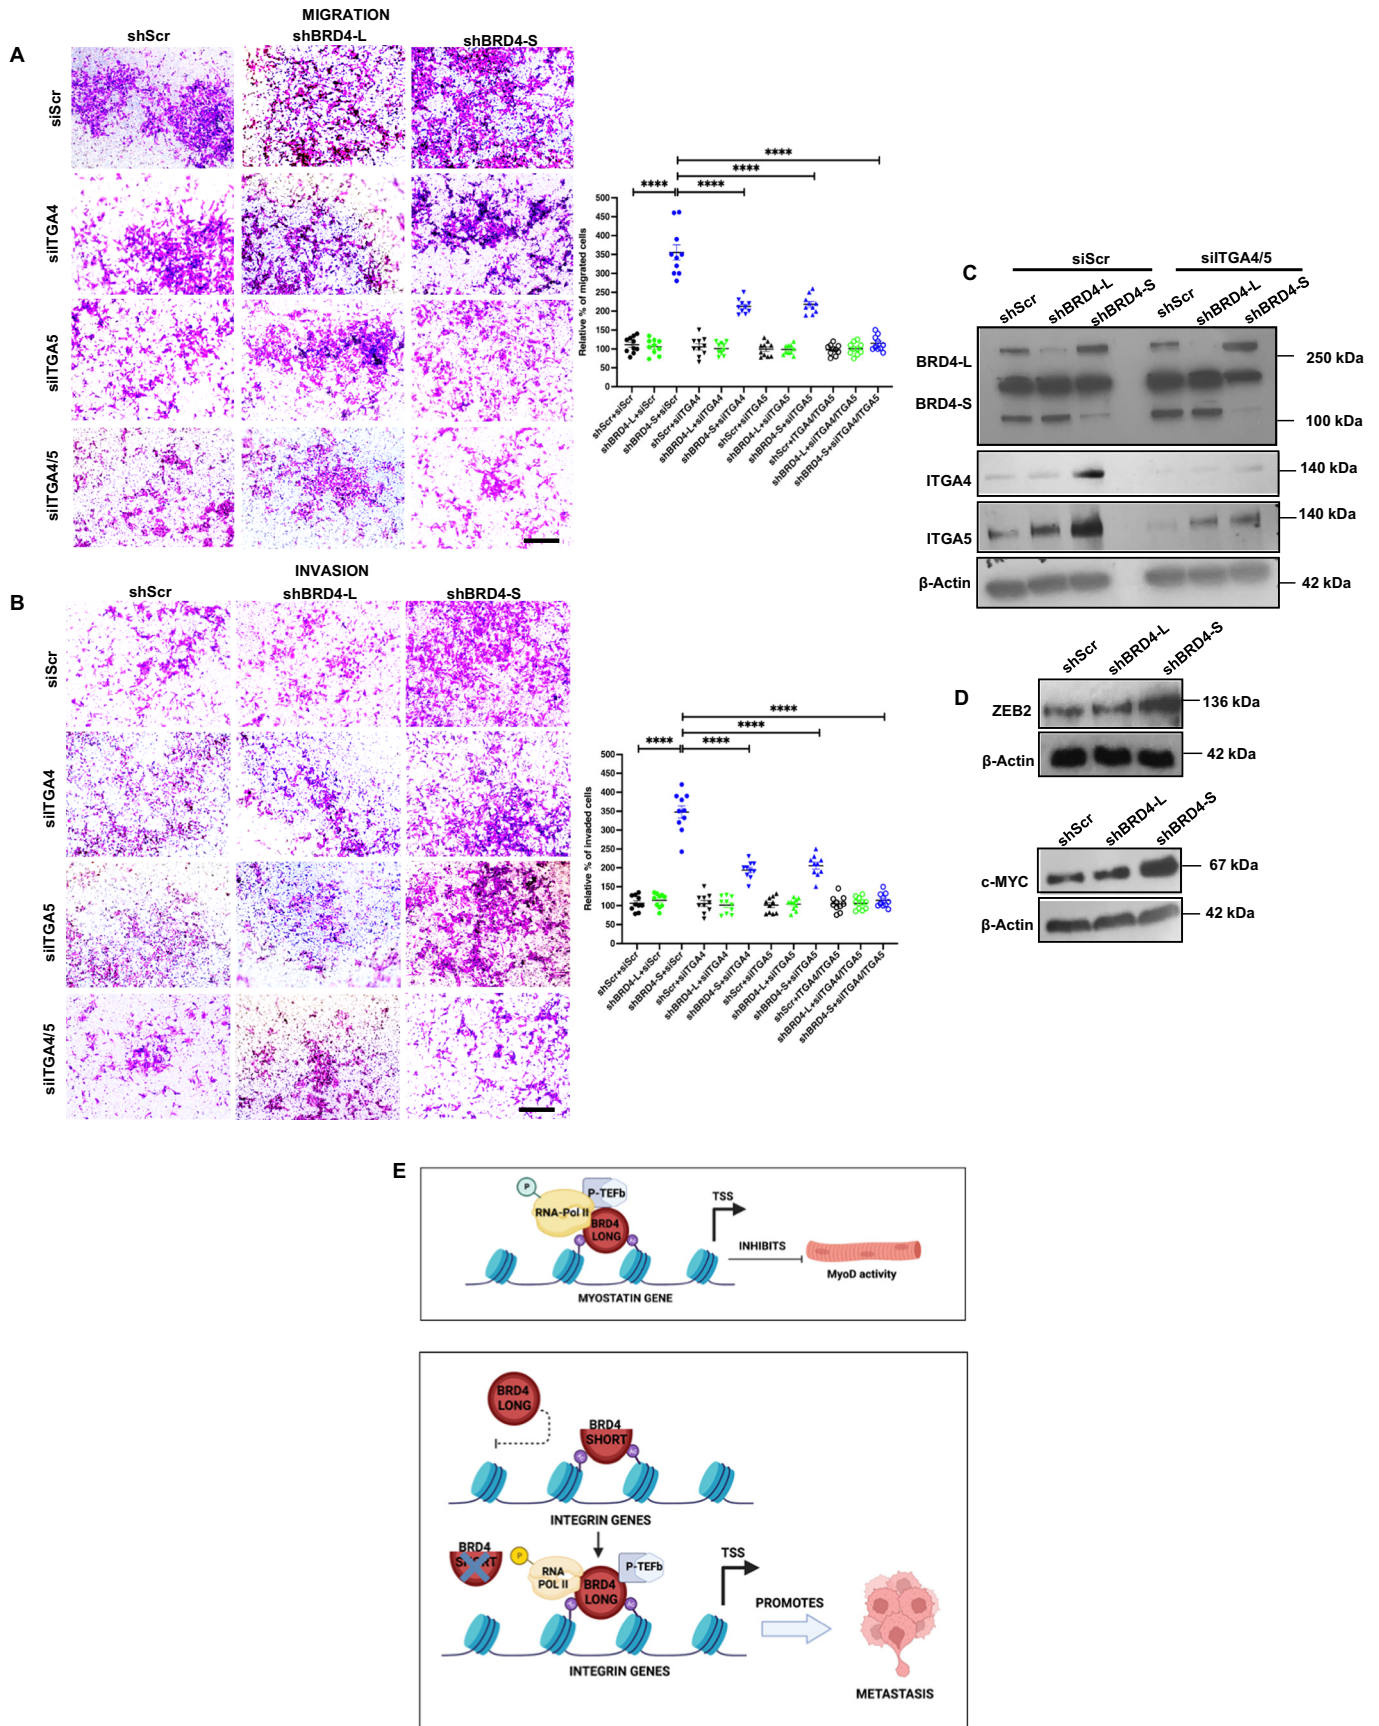

**◀ Figure EV5. ITGA4/5 knockdown rescues migration and invasion in shBRD4-S cells.**

(A,B) Migration and invasion was analysed by Transwell assays in shScr, shBRD4-L and shBRD4-S by transfecting them with siScr, siITGA4, siITGA5 or siITGA4 and 5. The inserts were stained with crystal violet. Images are representative of at least three biological replicates. Scale bar: 100  $\mu$ m. Scatter plots indicating the percentage of migration and invasion is shown. Error bars correspond to the average  $\pm$  SEM ( $n = 5$  biological replicates with 2 technical replicates shown). Two-tailed non-parametric unpaired t test was performed for statistical analysis.  $***p \leq 0.001$ ,  $****p \leq 0.0001$ . (C) Western blot analysis showing transient ITGA4 and ITGA5 knockdown efficiency in shScr, shBRD4-L and shBRD4-S cells as indicated.  $\beta$ -Actin was used as the loading control. Images are representative of at least three biological replicates. (D) Western blot analysis showing ZEB2 and c-MYC expression in shScr, shBRD4-L and shBRD4-S cells as indicated.  $\beta$ -Actin was used as the loading control. Images are representative of at least two biological replicates. (E) Graphical model summarizing the function of the BRD4 isoforms in ERMS. Source data are available online for this figure.
